# Supplementary material for: Svep1 stabilises developmental vascular anastomosis in reduced flow conditions
Source: PubMed Central journal article supplement (PMC8977097; doi:10.1242/dev.199858), 2022-03-25
Supplement: develop-149-199858-s1.pdf [file develop-149-199858-s1.pdf]

Supplementary Figure 1

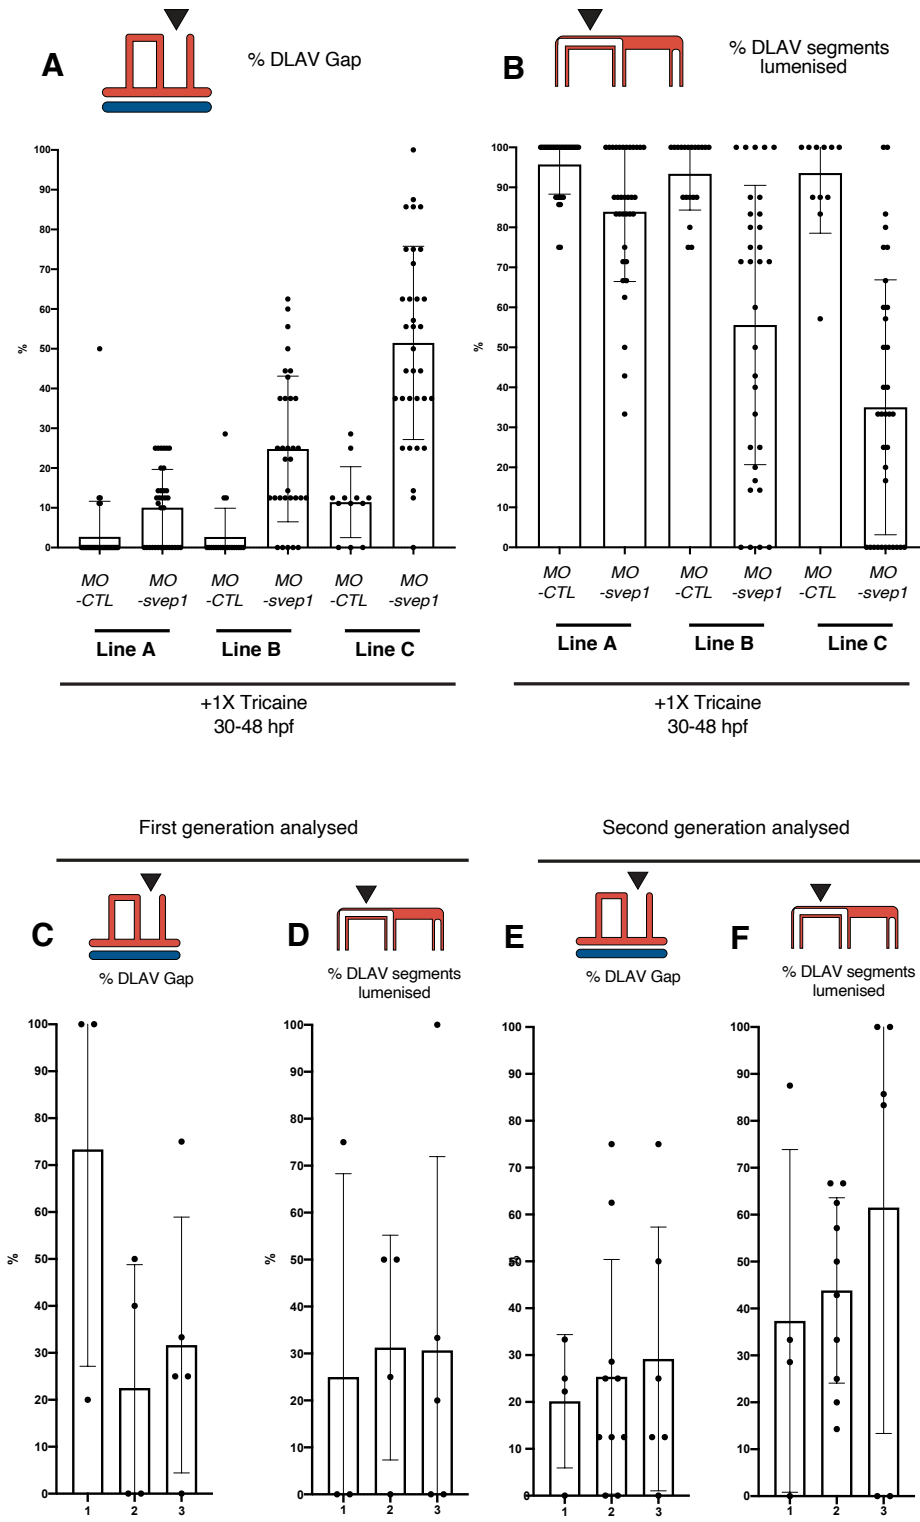

**Fig. S1. (A)** Bilateral quantifications of the percentage of gaps in the DLAV at 48 hpf in

Line A: *Tg(fli1a:eGFP)y1* (N=3, n=18 *MO-CTL* 5ng, n=17 *MO-svep1* 5ng),

Line B: *TgBAC(apln:eGFP); Tg(-0.8flt1:RFP)* (N=3, n=10 *MO-CTL* 5ng, n=16

*MO-svep1* 5ng), Line C: *TgBAC(flt1:YFP), Tg(kdrl:mCherry)* (N=3, n=6 *MO-*

*CTL* 5ng, n=17 *MO-svep1* 5ng). The embryos were treated with 1X (0.014%)

tricaine from 30 to 48 hpf.

**(B)** Bilateral quantifications of the percentage of lumenised segments in the DLAV

at 48 hpf in Line A: *Tg(fli1a:eGFP)y1* (N=3, n=18 *MO-CTL* 5ng, n=17 *MO-*

*svep1* 5ng), Line B: *TgBAC(apln:eGFP); Tg(-0.8flt1:RFP)* (N=3, n=10 *MO-*

*CTL* 5ng, n=16 *MO-svep1* 5ng), Line C: *TgBAC(flt1:YFP), Tg(kdrl:mCherry)*

(N=3, n=6 *MO-CTL* 5ng, n=17 *MO-svep1* 5ng). The embryos were treated

with 1X (0.014%) tricaine from 30 to 48 hpf.

**(C)** Unilateral quantifications of the percentage of gaps in the DLAV at 48 hpf in

*svep1<sup>hu4767</sup>* homozygous mutants (n=3, 4, 5 embryos) treated with 1X tricaine

(0.014%) from 30 to 48 hpf.

**(D)** Unilateral quantifications of the percentage of lumenised segments in the

DLAV at 48 hpf in *svep1<sup>hu4767</sup>* homozygous mutants (n=3, 4, 5 embryos)

treated with 1X tricaine (0.014%) from 30 to 48 hpf.

**(E)** Bilateral quantifications of the percentage of gaps in the DLAV at 48 hpf in

*svep1<sup>hu4767</sup>* (n=2, 5, 3 embryos) treated with 1X tricaine (0.014%) from 30 to

48 hpf (N=3).

**(F)** Bilateral quantifications of the percentage of lumenised segments in the DLAV

at 48 hpf in *svep1<sup>hu4767</sup>* homozygous mutants (n=2, 5, 3 embryos) treated with

1X tricaine (0.014%) from 30 to 48 hpf (N=3).

Supplementary Figure 2

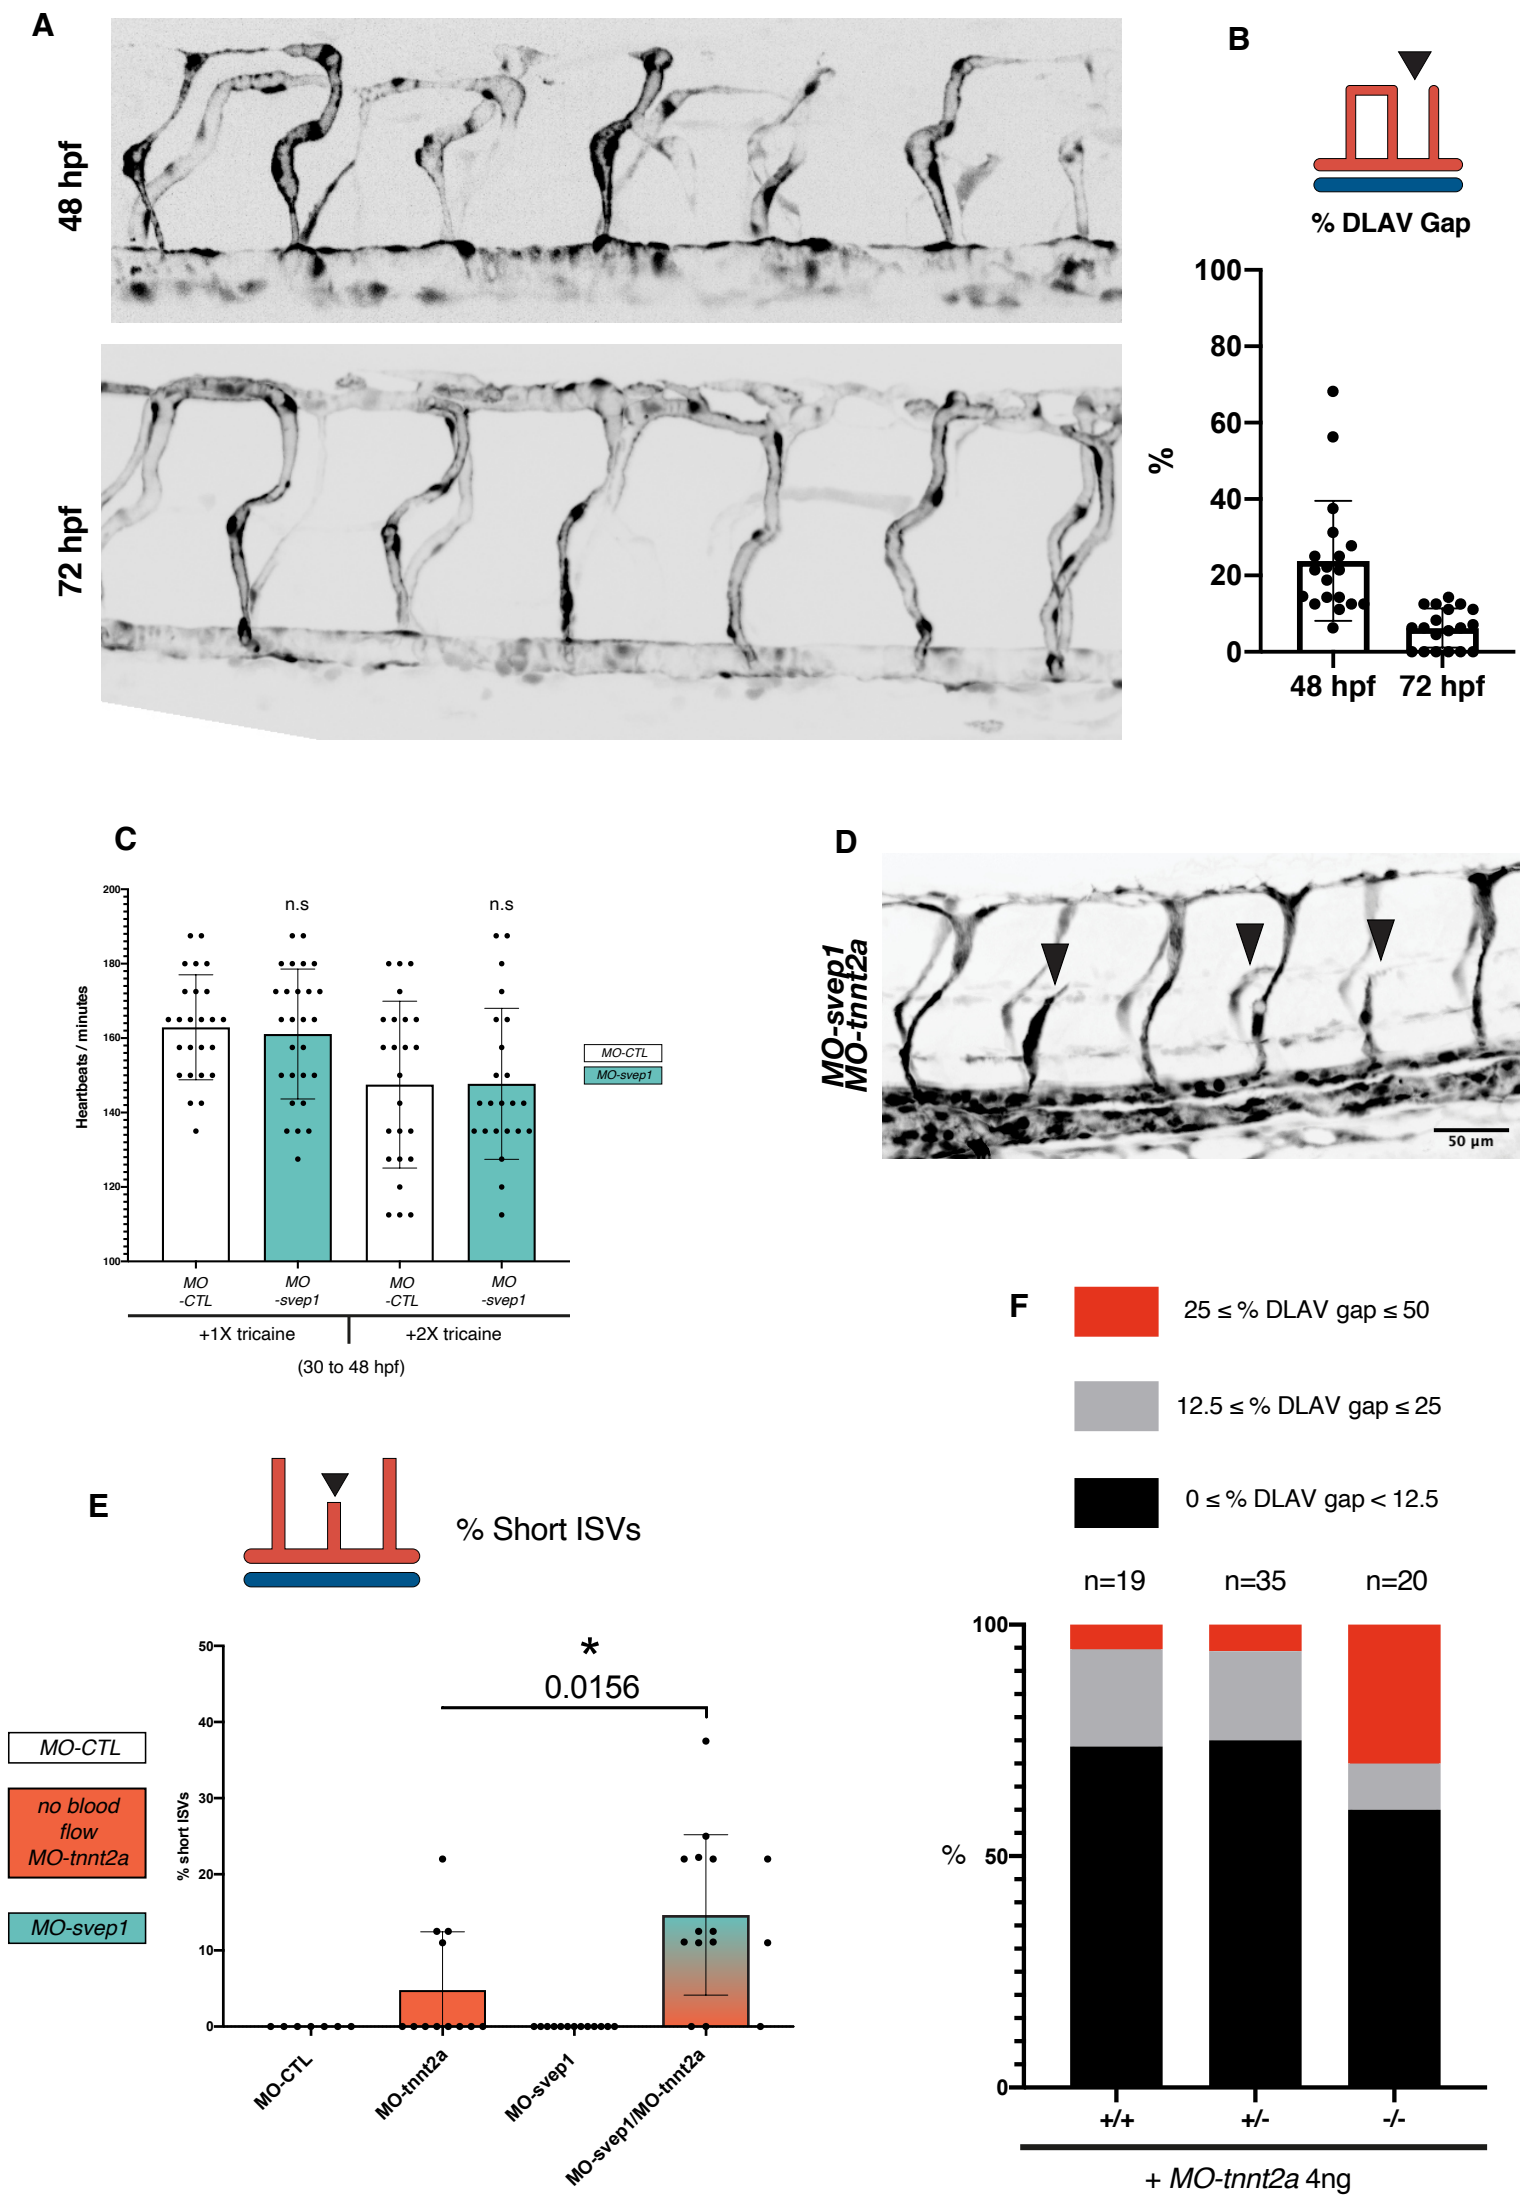

**Fig. S2. (A)** Representative image of a *Tg(-0.8flt1:RFP)<sup>hu333</sup>, svep1<sup>hu4767 -/-</sup>* embryo treated with 1X (0.014%) tricaine from 30 to 48 hpf and imaged at 48 and 72 hpf.

**(B)** Bilateral quantification of the percentage of gaps at 48 and 72 hpf in the DLAV of *svep1<sup>hu4767 -/-</sup>* embryo treated with 1X (0.014%) tricaine from 30 to 48 hpf (n=19, N=3).

**(C)** Quantification of heart rate (heartbeats/minute) in the dorsal aorta of *Tg[gata1a:dsRed]<sup>sd</sup>* MO-CTL (5ng) or MO-*svep1* (5ng) embryos at 48 hpf, treated with 1X (0.014%) or 2X (0.028%) tricaine from 30 hpf. (N=4, n=25, 24 MO-CTL (1x, 2X), n=27, 23 MO-*svep1* (1X, 2X)).

**(D)** Maximum intensity projection of zebrafish trunk in MO-*svep1* (5ng)/Mo-*tnnt2a* (4ng) embryo at 48 hpf. black arrowheads indicate short ISVs.

**(E)** Bilateral quantification of the percentage of short ISVs in the trunk of 48 hpf MO-CTL (5ng)(n=7), MO-*tnnt2a* (4ng)(n=12), MO-*svep1* (5ng)(n=13) and MO-*svep1*(5ng)/MO-*tnnt2a* (4ng)(n=15) embryos (N=3).

**(F)** Percentage of fish presenting with less than 12.5%, between 12.5 and 25% or above 25% gaps in the DLAV at 48 hpf in *svep1<sup>+/+</sup>* (n=19) , *svep1<sup>+/-</sup>* (n=35) or *svep<sup>-/-</sup>* (n=20) embryos injected with *MO-tnnt2a* (4ng) (N=4).

Supplementary Figure 3

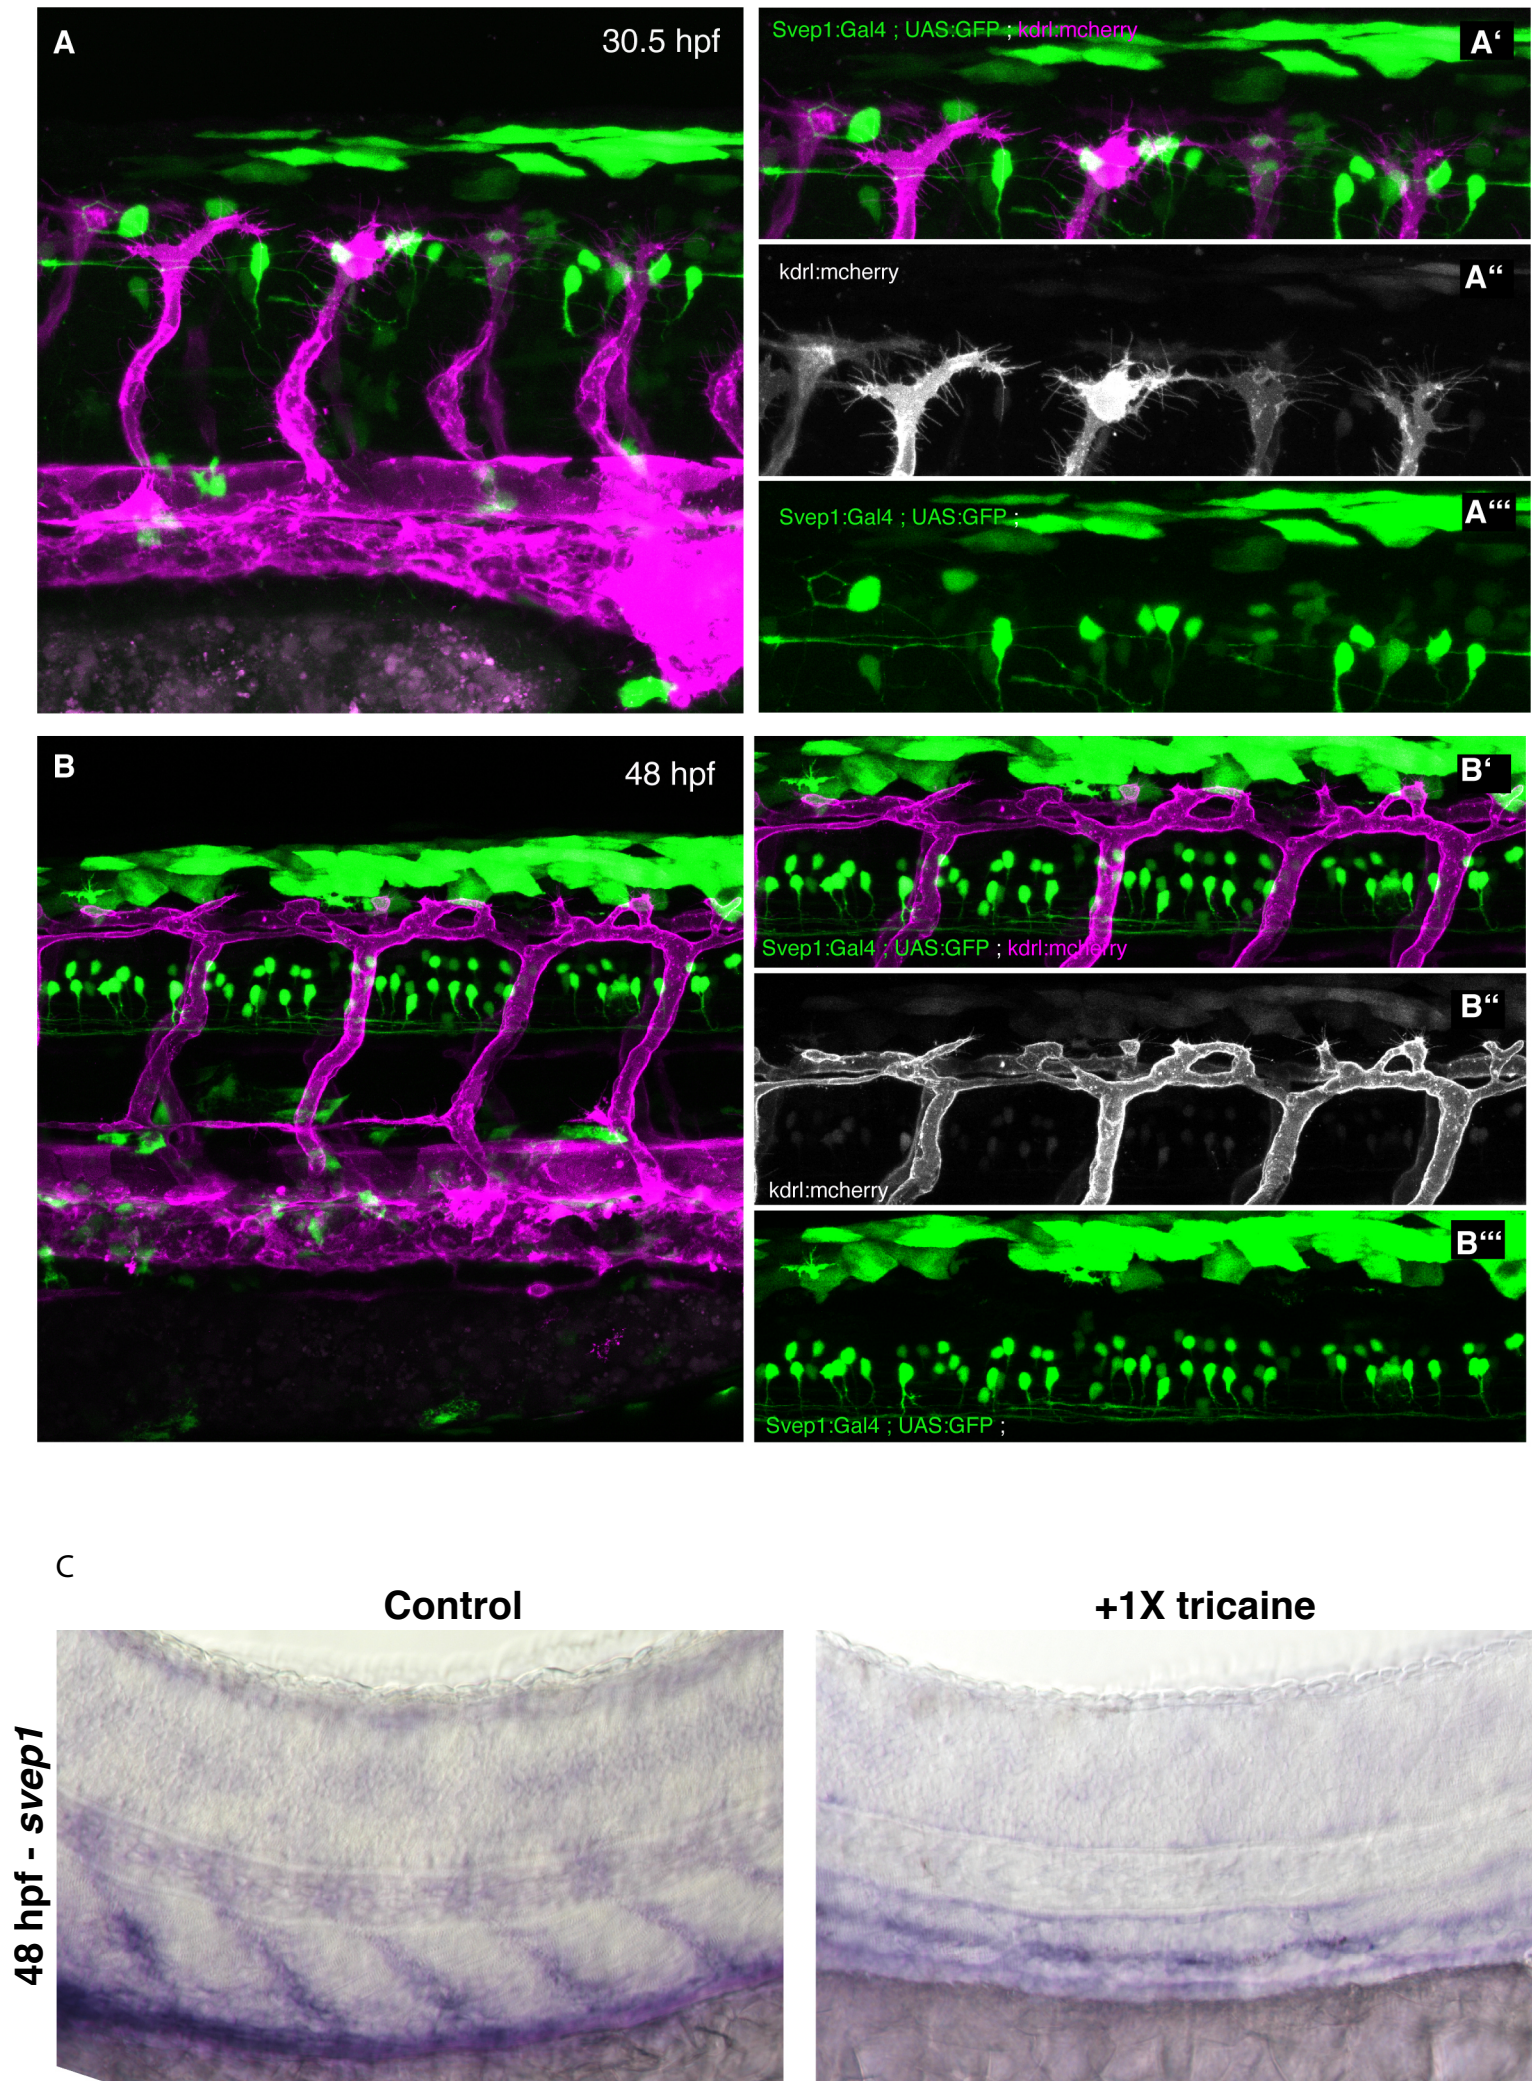

**Fig. S3. (A)** Representative images of 48 hpf *Tg(svep1:Gal4FF; UAS:eGFP);*

*Tg(kdrl:mcherry-CAAX)<sup>y171</sup>* in the trunk of embryos at 30.5 hpf.

**(B)** Representative images of 48 hpf *Tg(svep1:Gal4FF; UAS:eGFP);*

*Tg(kdrl:mcherry-CAAX)<sup>y171</sup>* in the trunk of embryos at 48 hpf.

**(C)** *In-situ svep1* endogenous expression in 48hpf embryos not treated (n=11)

or treated with 1X (0.0168%) tricaine from 30 to 48 hpf (n=18).



**Fig. S4. (A)** Representative image of p-ERK and GFP levels in FAC sorted endothelial cells from embryos treated with 1X (0.014%) tricaine from 30 to 48 hpf and 0nM (n=600 embryos – 290637 cells) or 50 nM (n=600 embryos, 300116 cells) ZM323881 (N=3 experiments, pooled).

**(B)** Quantification of p-ERK in FAC sorted endothelial cells from embryos treated with 1X (0.014%) tricaine from 30 to 48 hpf and 0nM (n=600 embryos – 290637 cells) or 50 nM (n=600 embryos, 300116 cells) Expression levels were normalised to GFP levels (N=3 experiments, pooled).

**(C)** Bilateral quantifications of the percentage of gaps in the DLAV at 48 hpf in WT embryos treated with 1X (0.014%) tricaine and 0 (n=16), 50 (n=15), 100 (n=15) and 150 nM (n=15) ZM32881 from 30 to 48 hpf (N=3). Kruskal-Wallis Anova test.

**(D)** Bilateral quantifications of the percentage of lumenised segments in the DLAV at 48 hpf in WT embryos treated with 1X (0.014%) tricaine and 0 (n=16), 50 (n=15), 100 (n=15) and 150 nM (n=15) ZM32881 from 30 to 48 hpf (N=3). Kruskal-Wallis Anova test.

**(E)** Bilateral quantifications of the percentage of gaps in the DLAV at 48 hpf in *MO-CTL* (5 ng) (n=17 (0nM ZM32881), n=16 (150nM ZM32881)) *MO-flt1* (1ng) (n=17 (0 nM ZM32881), n=20 (150nM ZM32881)) embryos treated with 1X (0.014%) tricaine and 0 or 50 nM ZM32881 from 30 to 48 hpf (N=4).

**(F)** Bilateral quantifications of the percentage of lumenized segments in the DLAV at 48 hpf in *MO-CTL* (5 ng) (n=17 (0nM ZM32881), n=16 (150nM ZM32881)) *MO-flt1* (1ng) (n=17 (0 nM ZM32881), n=20 (150nM ZM32881)) embryos treated with 1X (0.014%) tricaine and 0 or 50 nM ZM32881 from 30 to 48 hpf (N=4).



Supplementary Figure 5

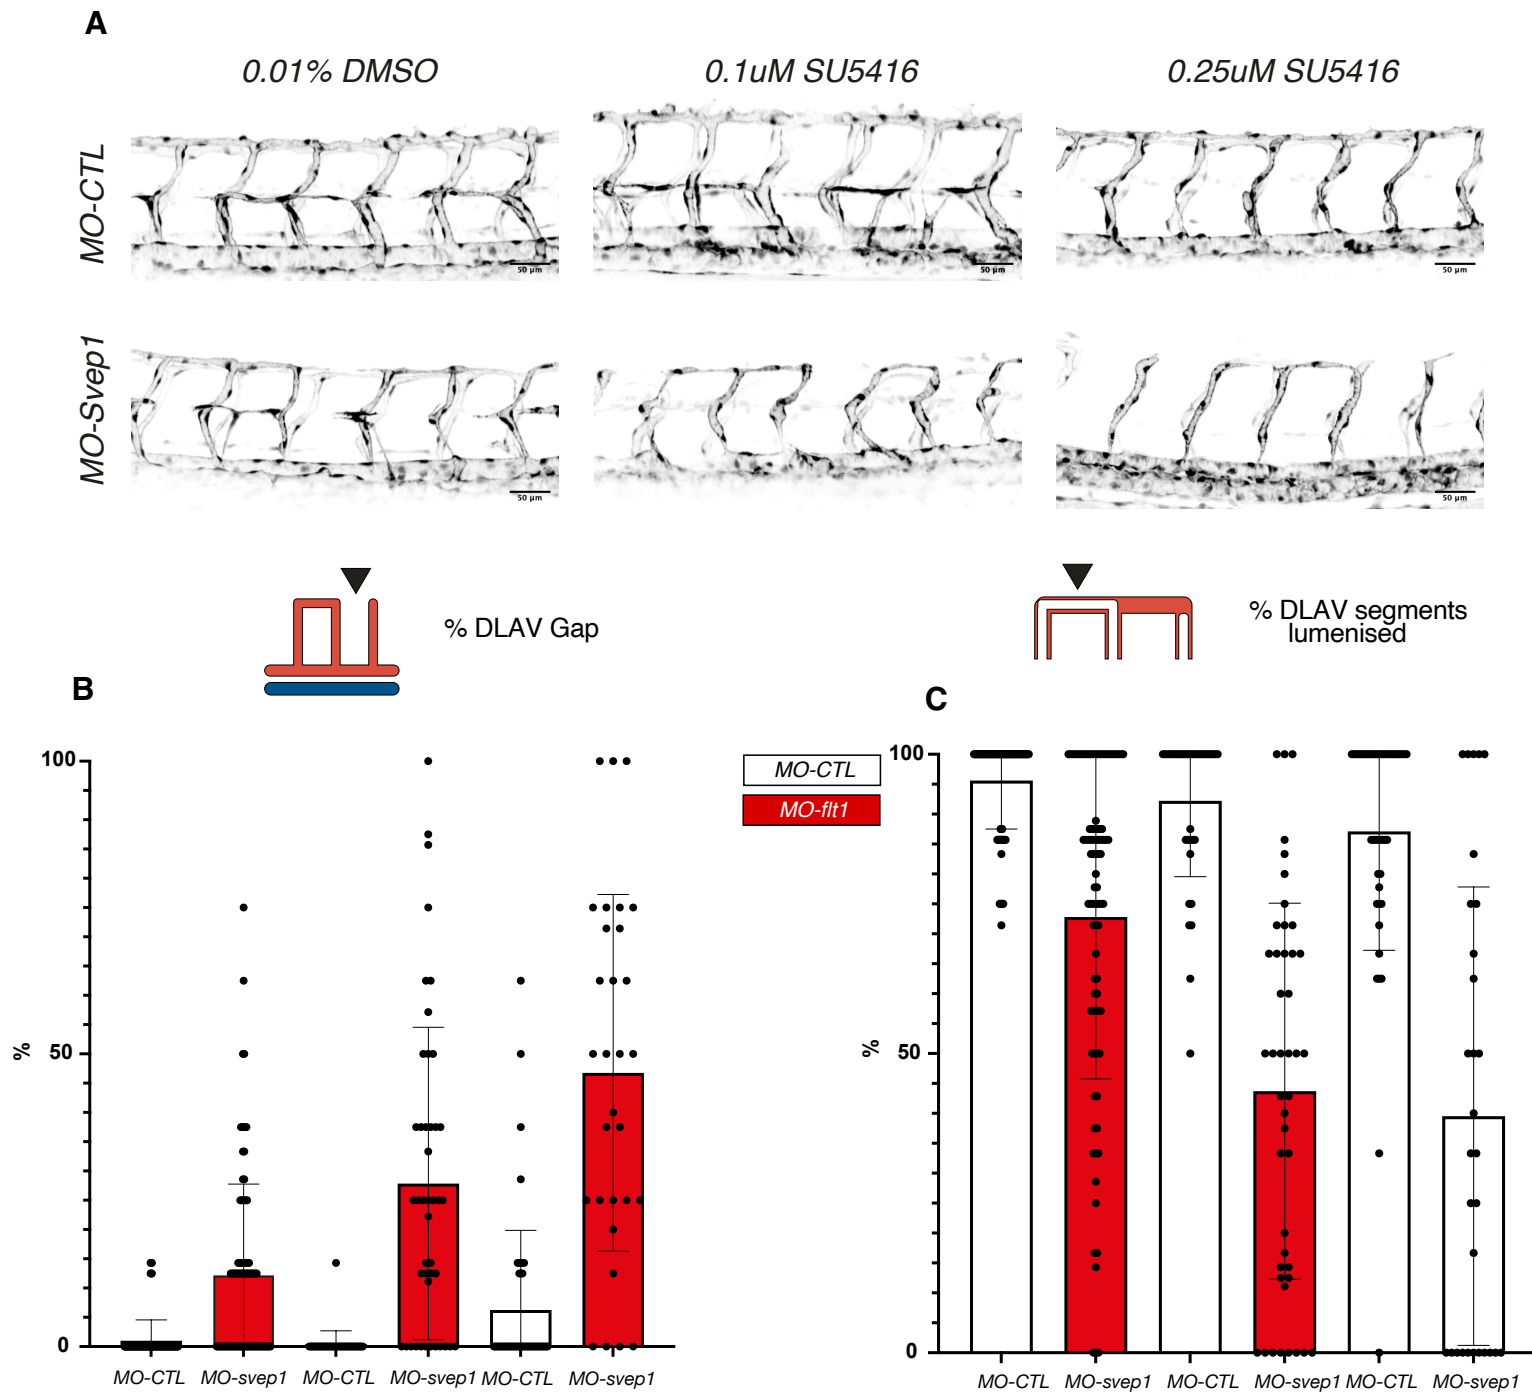

- Fig. S5. A)** Representative images of *Tg(fli1a:eGFP)<sup>y1</sup>* embryos at 48 hpf, following treatment with 1X (0.014%) tricaine from 30 hpf, in combination with 0.01%DMSO, 0.1 $\mu$ M SU5416 or 0.25 $\mu$ M SU5416.
- B)** Bilateral quantifications of the percentage of gaps in the DLAV at 48 hpf in *MO-CTL* (5 ng) (n=80 (0.01% DMSO), n=38 (0.1 $\mu$ M SU5416), n=46 (0.25 $\mu$ M DMSO), n=30 (0.5 $\mu$ M SU5416)) *MO-svep1* (5ng) (n=88 (0.01% DMSO), n=44 (0.1 $\mu$ M SU5416), n=30 (0.25 $\mu$ M DMSO), n=22 (0.5 $\mu$ M SU5416)) embryos treated with 1X (0.014%) tricaine and 0.01% DMSO (N=6) or 0.1 (N=3), 0.25 (N=4), 0.5 $\mu$ M (N=4) SU5416 from 30 to 48 hpf.
- C)** Bilateral quantifications of the percentage of lumenised segments in the DLAV at 48 hpf in *MO-CTL* (5 ng) (n=80 (0.01% DMSO), n=38 (0.1 $\mu$ M SU5416), n=46 (0.25 $\mu$ M DMSO), n=30 (0.5 $\mu$ M SU5416)) *MO-svep1* (5ng) (n=88 (0.01%DMSO), n=44 (0.1 $\mu$ M SU5416), n=30 (0.25 $\mu$ M DMSO), n=22 (0.5 $\mu$ M SU5416)) embryos treated with 1X (0.014%) tricaine and 0.01% DMSO (N=6) or 0.1 (N=3), 0.25 (N=4), 0.5 $\mu$ M (N=4) SU5416 from 30 to 48 hpf.

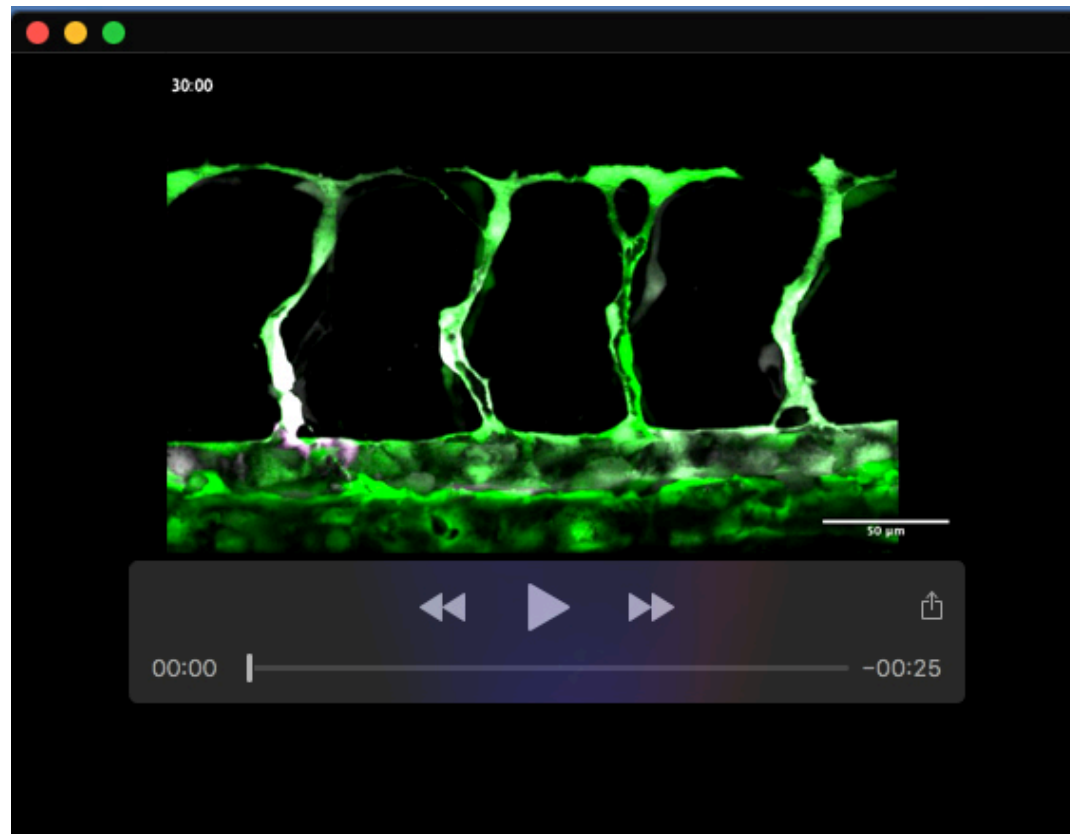

**Movie 1.** Time lapse movie of *MO-CTL* (5ng) *Tg(-0.8flt1:RFP)<sup>hu3333</sup>*; *TgBAC(flt4:Citrine)* embryo treated with 1X (0.014%) tricaine from 30 to 48 hpf. 15-minute interval between frames.

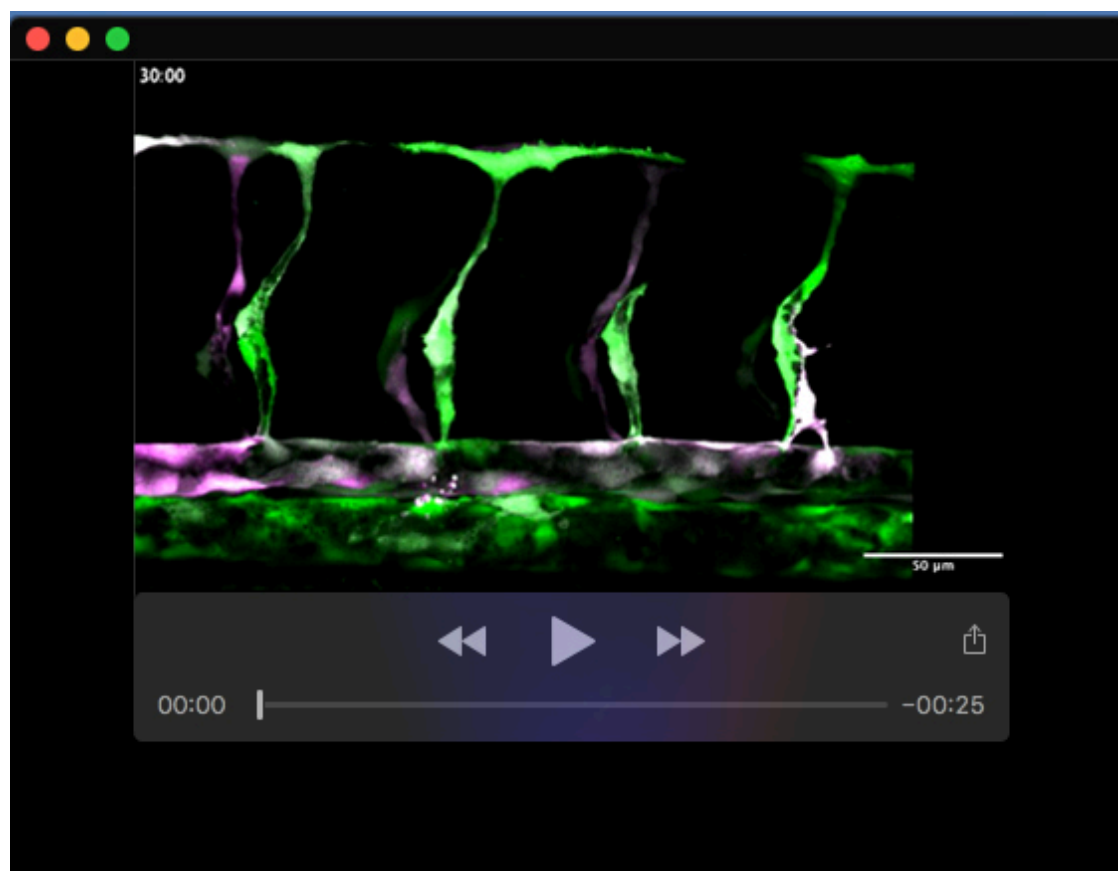

**Movie 2.** Time lapse movie of *MO-svep1* (5ng) *Tg(-0.8flt1:RFP)<sup>hu3333</sup>*; *TgBAC(flt4:Citrine)* embryos treated with 1X (0.014%) tricaine from 30 to 48 hpf. 15-minute interval between frames.
